# Supplementary material for: Elucidation of the behavior of oxygen remaining in water molecules after hydrogen atom abstraction in the plasma/liquid (P/L) interfacial reaction: improvement in the selectivity of ammonia synthesis and parallel production of hydrogen gas
Source: Royal Society of Chemistry journal article supplement (doi:10.1039/d2gc03491c), 2022-12-14
Supplement: d2gc03491c1.pdf [file d2gc03491c1.pdf]

## Supporting Information

**Elucidation of the behavior of oxygen remaining in water molecules after hydrogen atom abstraction in the Plasma/Liquid (P/L) interfacial reaction: Improvement in the selectivity of ammonia synthesis and parallel production of hydrogen gas**

Souma Yoshida<sup>†</sup>, Naoya Murakami<sup>† †</sup>, Yoshiyuki Takatsuji<sup>†</sup>, and Tetsuya Haruyama<sup>†\*</sup>

<sup>†</sup> *Division of Functional Interface Engineering, Department of Biological Functions and Engineering, Kyushu Institute of Technology. Kitakyushu Science and Research Park, Kitakyushu, Fukuoka 808-0196, Japan*

<sup>† †</sup> *Division of Photo-functional Nanomaterials, Department of Biological Function and Engineering, Kyushu Institute of Technology. Kitakyushu Science and Research Park, Kitakyushu, Fukuoka 808-0196, Japan*

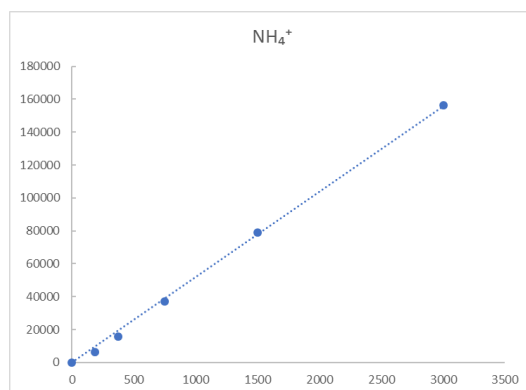

(a)

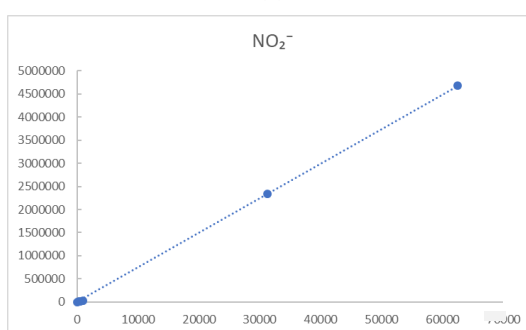

(b)

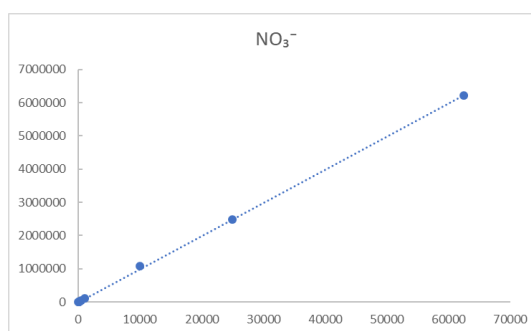

(c)

**Figure S1.** Calibration curve and calibration curve precision using standard sample for ammonium, nitrate, and nitrite ions in ion chromatography analysis. Correlation coefficient (R): ammonium ion ( $\text{NH}_4^+$ )  $R = 0.9998$ , nitrite ion ( $\text{NO}_2^-$ )  $R = 0.9999$ , nitrate ion ( $\text{NO}_3^-$ )  $R = 0.9998$ .

**Standard chemicals:**

All standard chemicals were purchased from Wako Chemicals Co., Ltd.

Ammonium ion ( $\text{NH}_4^+$ ): Ammonium ion standard solution ( $\text{NH}_4\text{NO}_3$  (aq.))

Nitrate ion ( $\text{NO}_3^-$ ): Nitrate ion standard solution ( $\text{NaNO}_2$  (aq.))

Nitrite ion ( $\text{NO}_2^-$ ): Nitrate ion standard solution ( $\text{NaNO}_3$  (aq.))

## Analysis conditions

## Cation chromatography

Eluent: 3.0 mM methanesulfonic acid (aq.)

Flow rate: 1.9 mL/min

Column temperature: 40 °C

## Anion chromatography

Eluent: 3.6 mM sodium carbonate (aq.)

Flow rate: 0.8 mL/min

Column temperature: 45 °C

**Table S1.** Measurement ranges of  $\text{NH}_3$ ,  $\text{NO}$ , and  $\text{NO}_2$  using a Kitagawa type detector tube.

| Gas composition | Measuring range (ppm) |
|-----------------|-----------------------|
| $\text{NH}_3$   | 0.2 - 20              |
| $\text{NO}$     | 10 - 300              |
| $\text{NO}_2$   | 1 - 40                |

(a) DBD discharge

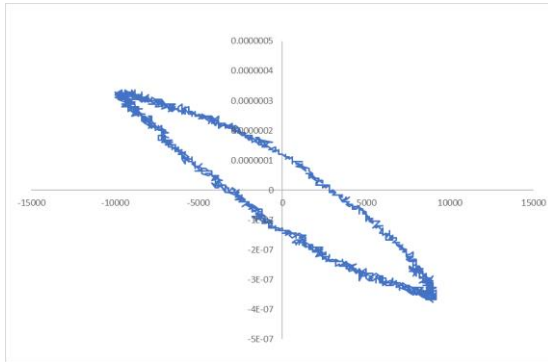

(b) PbDBD discharge filled with glass beads

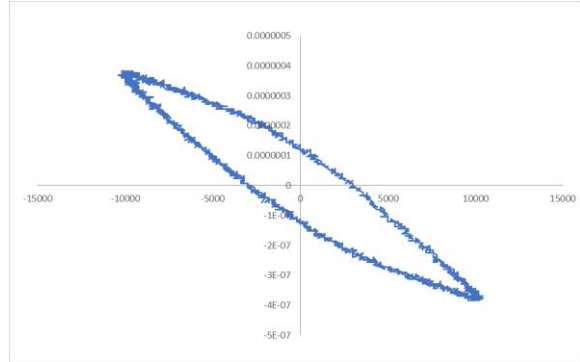

(c) PbDBD discharge filled with alumina beads

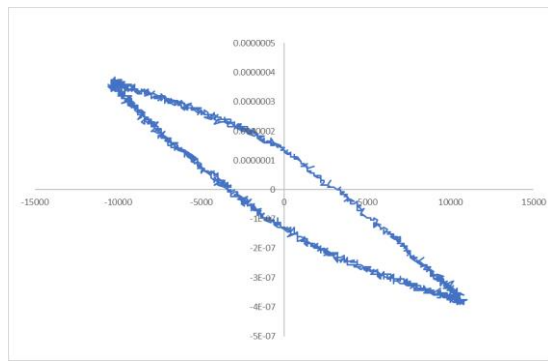

(d) PbDBD discharge filled with titania beads

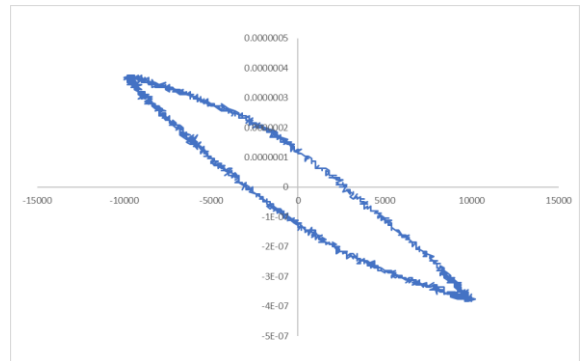

**Figure S2.** The electric power required for (a) a DBD discharge and PbDBD discharge filled with, (b) glass, (c) alumina, and (d) with titania beads to activate nitrogen was determined by preparing Lissajous curves.

**Table S2.** Electric power equipments.

|                                           | Electric power [W] |
|-------------------------------------------|--------------------|
| DBD discharge                             | 52.22              |
| PbDBD discharge filled with glass beads   | 53.14              |
| PbDBD discharge filled with alumina beads | 56.61              |
| PbDBD discharge filled with titania beads | 52.71              |

(a) DBD discharge

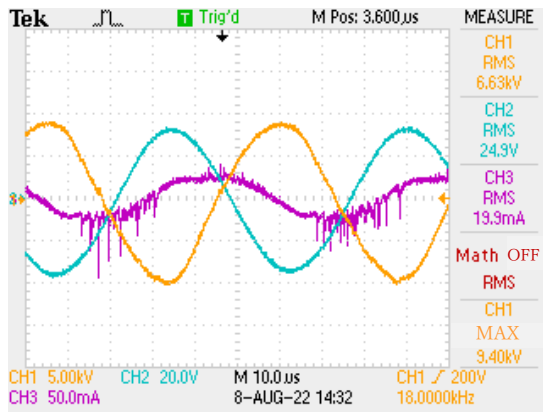

(b) PbDBD discharge filled with glass beads

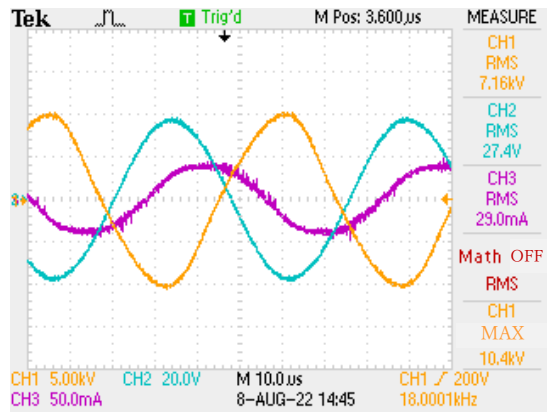

(c) PbDBD discharge filled with alumina beads

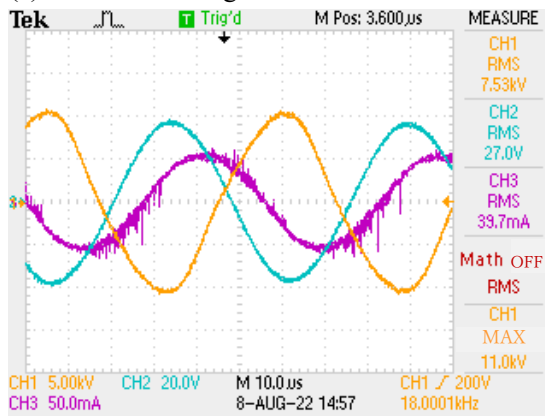

(d) PbDBD discharge filled with titania beads

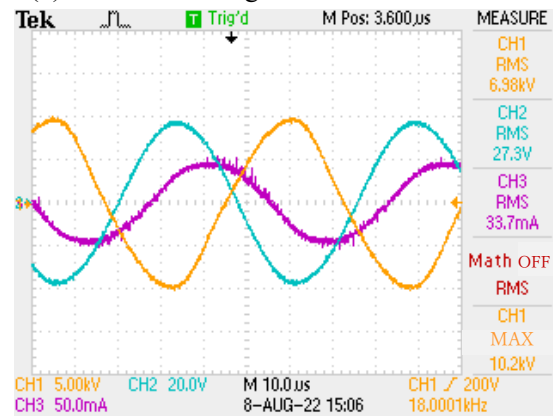

**Figure S3.** Waveforms obtained using an oscilloscope. CH1: voltage of the reactor, CH2: voltage of the capacitor, and CH3: current of the entire circuit. (a) DBD discharge and PbDBD discharge filled with (b) glass, (c) alumina, and (d) titania beads.
